# Supplementary figures and images for: A cyclic (H2O)4cluster characterized in the solid state disappears on heating and regenerates from water vapor: A supramolecular reversible gas–solid reaction
Source: Royal Society of Chemistry journal article supplement (doi:10.1039/b303539p), 2003-01-01

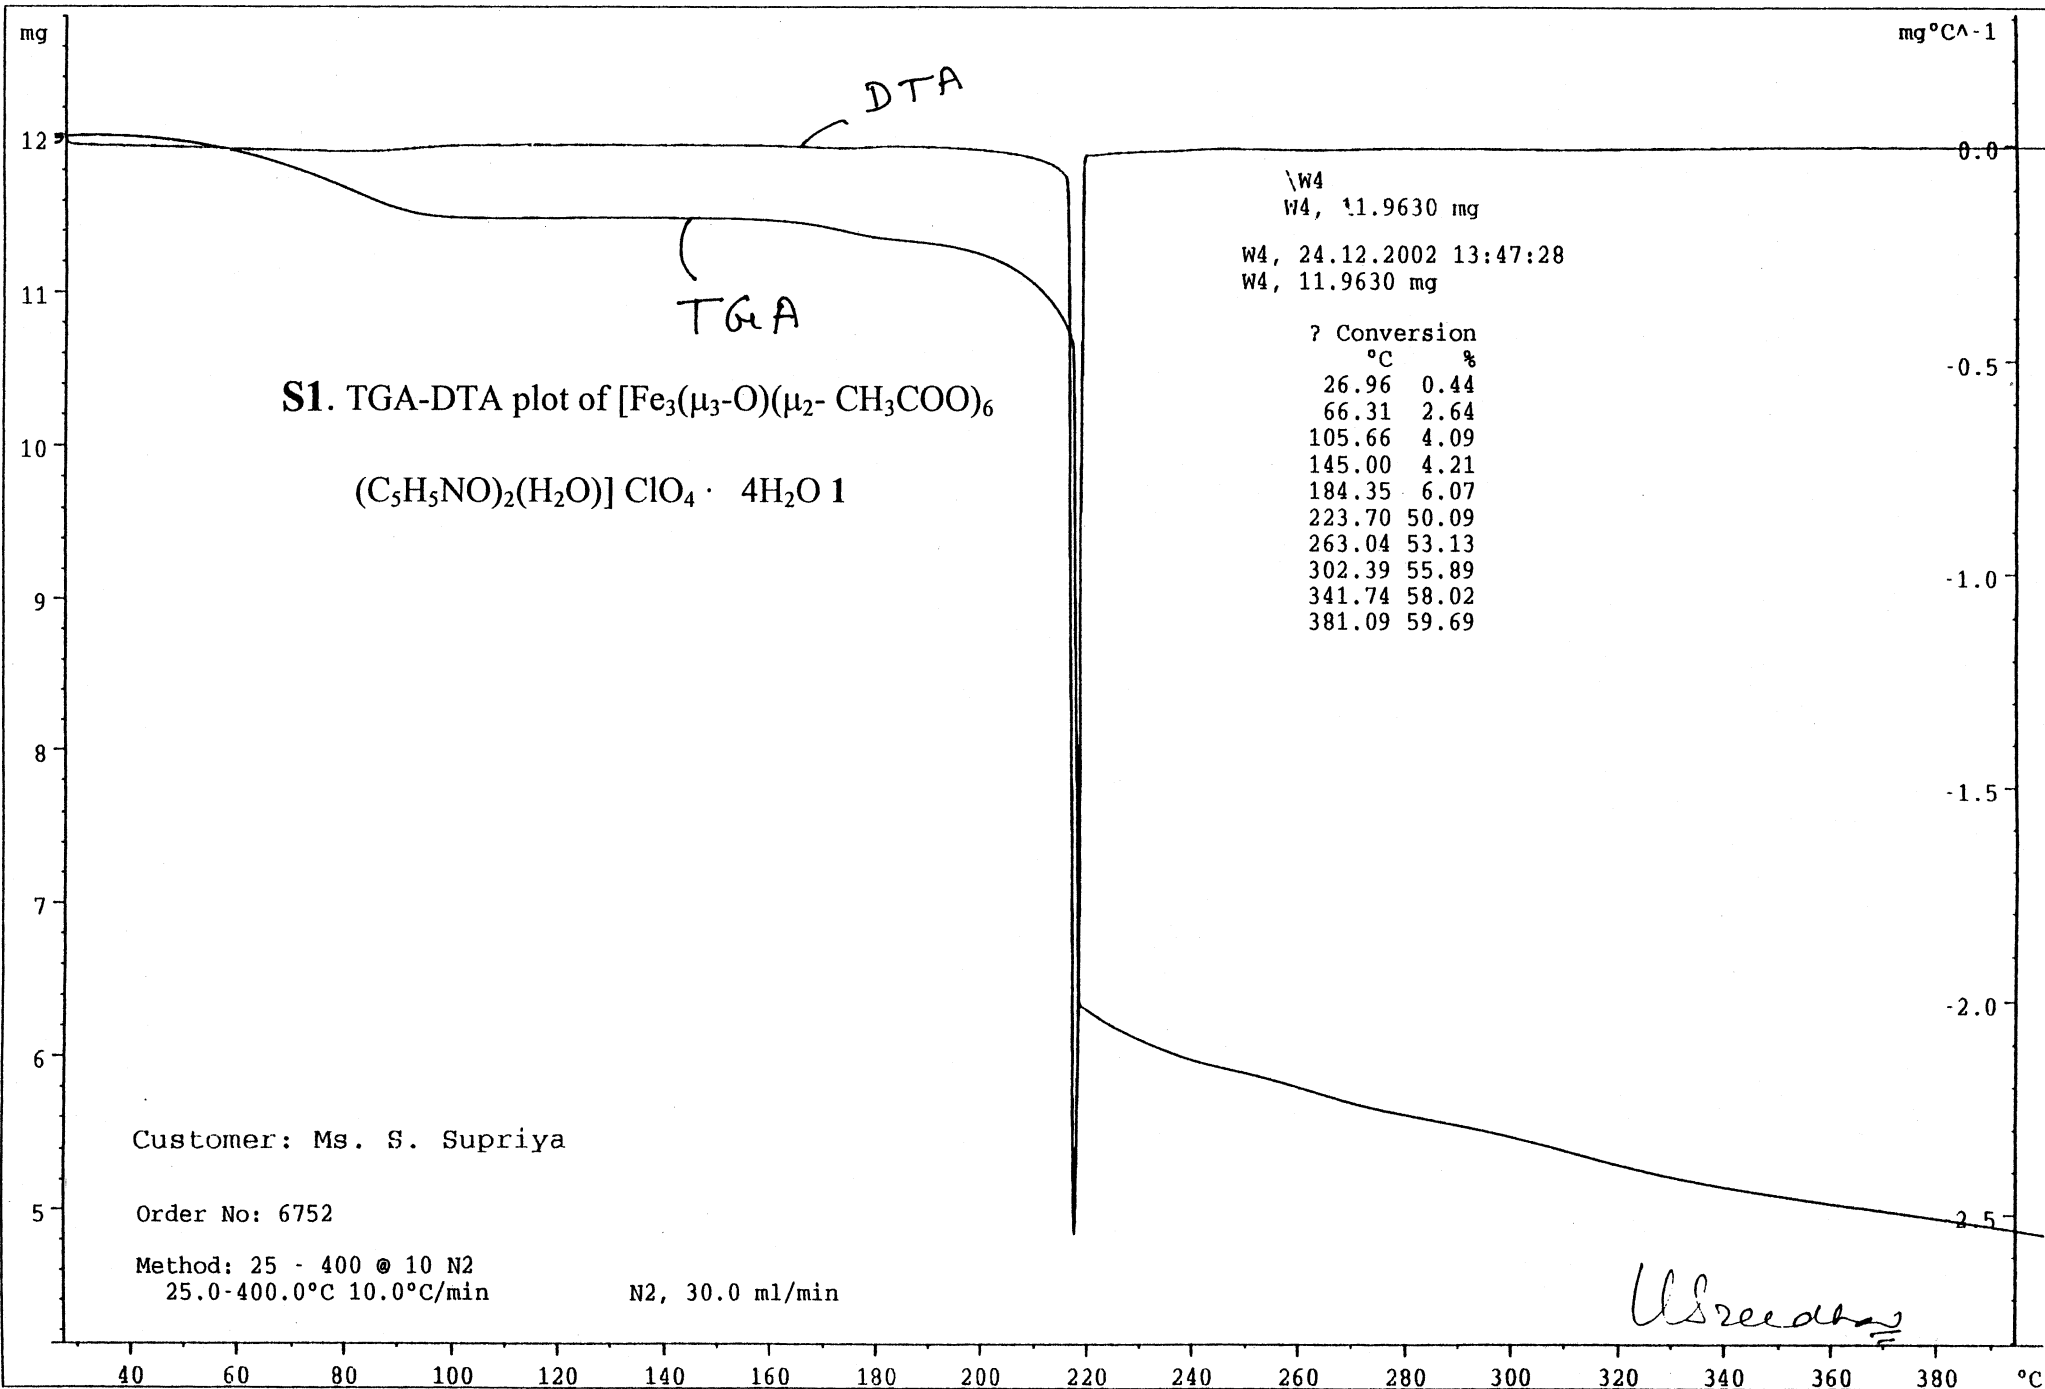

Supplement: b303539p-s1.pdf [file b303539p-s1.pdf]
